# Supplementary material for: Axial coordination changes the morphology of porphyrin assemblies in an organogel system
Source: Royal Society of Chemistry journal article supplement (doi:10.1039/b602025a), 2006-01-01
Supplement: b602025a.pdf [file b602025a.pdf]

## Supporting Information

### Axial coordination changes the morphology of porphyrin assemblies in an organogel system

Takanori Kishida, Norifumi Fujita, Osamu Hirata and Seiji Shinkai\*

*Department of Chemistry and Biochemistry, Graduate School of Engineering and Center for Future Chemistry, Kyushu University 744 Motoooka, Nishi-ku, Fukuoka, Fukuoka 819-0395, Japan. E-mail: [seijitcm@mbox.nc.kyushu-u.ac.jp](mailto:seijitcm@mbox.nc.kyushu-u.ac.jp); Fax: +81 92 802 2820*

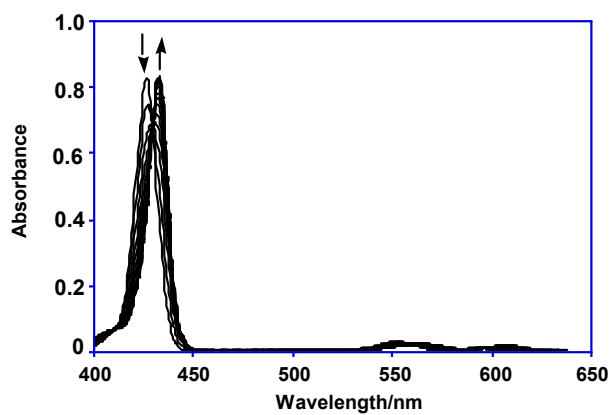

**Supplementary Fig. 1** UV-VIS absorption spectral change of the benzene solution of **4•Zn** by piperazine;  $[4\bullet\text{Zn}] = 1.5 \times 10^{-6}$  M,  $[\text{piperazine}] = 0\text{-}40.5$  equiv. for **4•Zn**, at 25 °C.
